# Supplementary material for: Genomic diversity of prevalent Staphylococcus epidermidis multidrug-resistant strains isolated from a Children’s Hospital in México City in an eight-years survey
Source: PeerJ journal article supplement (doi:10.7717/peerj.8068), 2019-11-20
Supplement: Figure-S1.pdf [file Figure-S1.pdf]

A

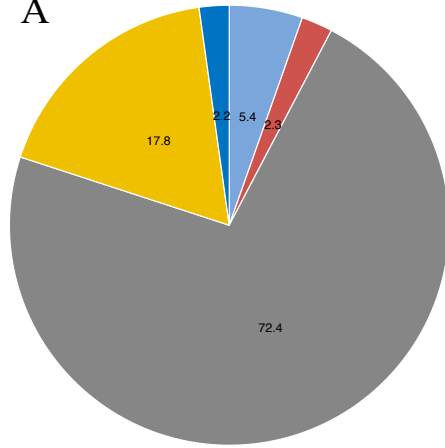

Strain

- Others
- S.aureus
- S.epidermidis
- S.haemolyticus
- S.hominis

B

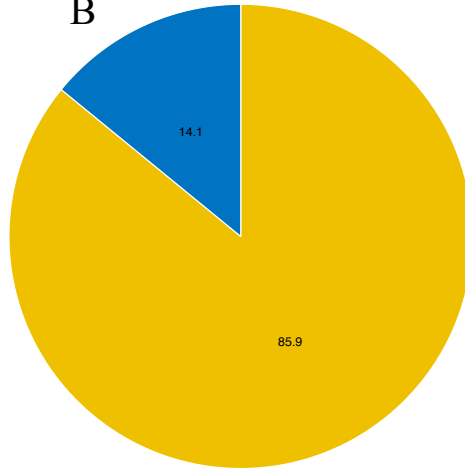

Patient

- Adult
- New Born

C

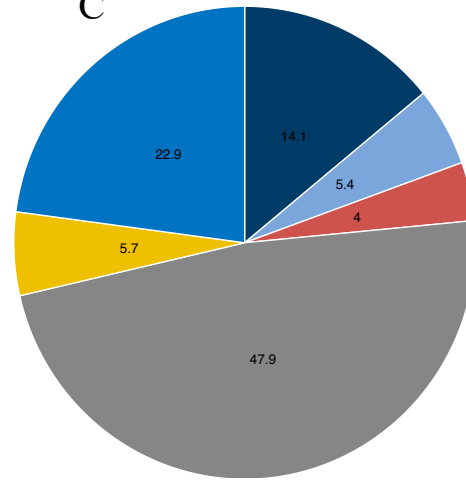

Sample origin

- Blood
- Blood Culture
- Catheter
- Cerebrospinal Fluid
- Conjunctive
- Other
