# Supplementary material for: Genomic diversity of prevalent Staphylococcus epidermidis multidrug-resistant strains isolated from a Children’s Hospital in México City in an eight-years survey
Source: PeerJ journal article supplement (doi:10.7717/peerj.8068), 2019-11-20

Figure S1.

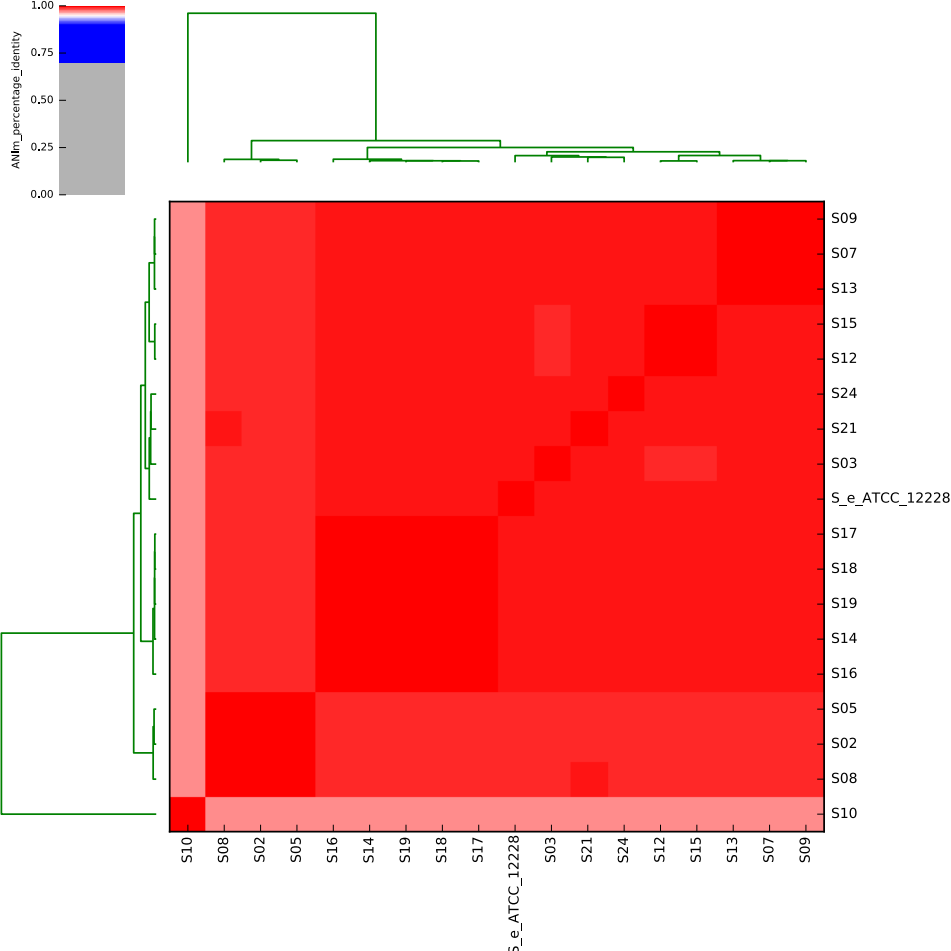

Supplement: Figure-S3.pdf [file Figure-S3.pdf]
