# Supplementary material for: Genomic diversity of prevalent Staphylococcus epidermidis multidrug-resistant strains isolated from a Children’s Hospital in México City in an eight-years survey
Source: PeerJ journal article supplement (doi:10.7717/peerj.8068), 2019-11-20

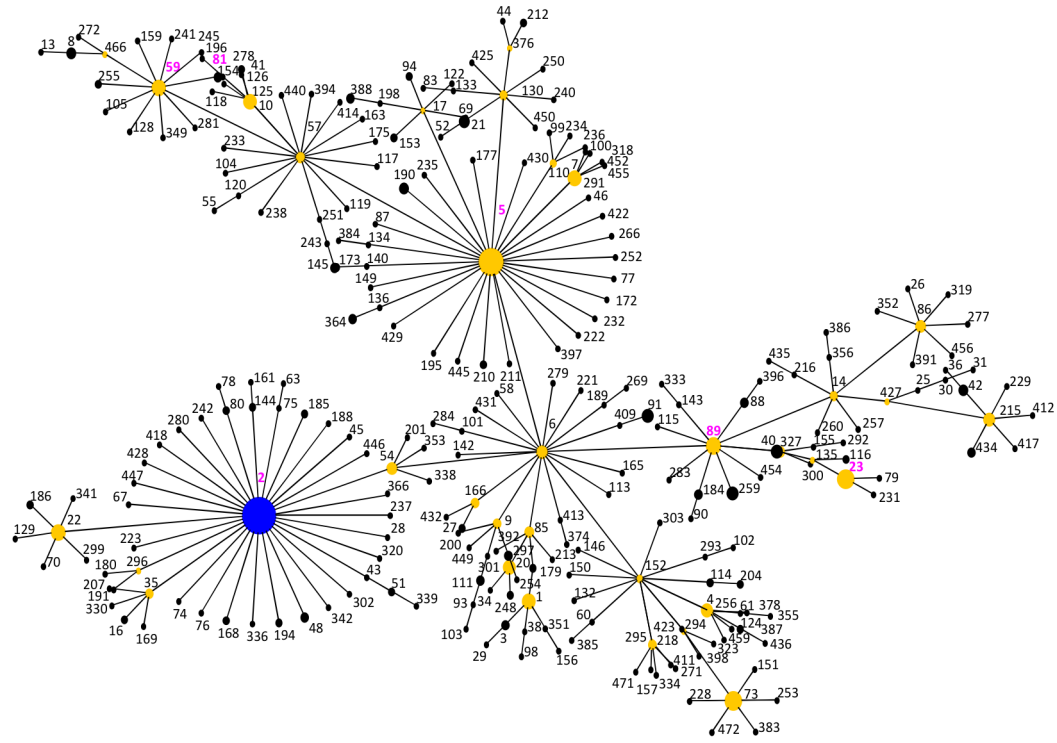

Supplement: Figure_S5.pdf [file Figure_S5.pdf]
