# Supplementary material for: Genomic diversity of prevalent Staphylococcus epidermidis multidrug-resistant strains isolated from a Children’s Hospital in México City in an eight-years survey
Source: PeerJ. 2019 Nov 20;7:e8068. doi: 10.7717/peerj.8068 (PMC6874853; doi:10.7717/peerj.8068)
Supplement: Table S3 [file peerj-07-8068-s010.xlsx]

## Sheet: groups for recomb
#Organism Name	Strain	Assembly
Sep NCBI complete genomes ctr
Staphylococcus epidermidis ATCC 12228	ATCC 12228	GCA_000007645.1
Staphylococcus epidermidis RP62A	RP62A	GCA_000011925.1
Staphylococcus epidermidis PM221	PM221	GCA_000751035.1
Staphylococcus epidermidis	SEI	GCA_000759555.1
Staphylococcus epidermidis	14.1.R1	GCA_001956655.2
Staphylococcus epidermidis	1457	GCA_002085695.1
Staphylococcus epidermidis	ATCC 12228	GCA_002215535.1
Staphylococcus epidermidis	DAR1907	GCA_002850315.1
Staphylococcus epidermidis	FDAARGOS_153	GCA_002944995.1
Staphylococcus epidermidis	FDAARGOS_161	GCA_002954055.1
Staphylococcus epidermidis	BPH0662	GCA_900086615.1
Sep NCBI ctr1
Staphylococcus epidermidis	ATCC 12228	GCA_002215535.1
Staphylococcus epidermidis	SE90	GCA_002749455.1
Staphylococcus epidermidis	SE95	GCA_002749515.1
Staphylococcus epidermidis	NGS-ED-1109	GCA_000966715.1
Staphylococcus epidermidis	737_SEPI	GCA_001074105.1
Staphylococcus epidermidis	NW32	GCA_001431005.1
Staphylococcus epidermidis	SE2.9	GCA_001465375.1
Staphylococcus epidermidis	SE4.7	GCA_001465385.1
Staphylococcus epidermidis	SE4.8	GCA_001465395.1
Staphylococcus epidermidis	FDAARGOS_157	GCA_001473265.2
Staphylococcus epidermidis	SA6	GCA_001476515.1
Staphylococcus epidermidis	SB7c	GCA_001476525.1
Staphylococcus epidermidis	SB7b	GCA_001477325.1
Staphylococcus epidermidis	ABKUX	GCA_002221835.1
Staphylococcus epidermidis FRI909	FRI909	GCA_000186205.2
Staphylococcus epidermidis VCU118	VCU118	GCA_000247045.2
Staphylococcus epidermidis VCU128	VCU128	GCA_000247185.2
Staphylococcus epidermidis VCU129	VCU129	GCA_000247205.2
Staphylococcus epidermidis NIHLM015	NIHLM015	GCA_000276205.1
Staphylococcus epidermidis NIHLM057	NIHLM057	GCA_000276425.1
Staphylococcus epidermidis NIHLM061	NIHLM061	GCA_000276445.1
Staphylococcus epidermidis UC7032	UC7032	GCA_000410915.1
Staphylococcus epidermidis APO27	APO27	GCA_000417945.2
Staphylococcus epidermidis APO35	APO35	GCA_000417965.2
Staphylococcus epidermidis CIM40	CIM40	GCA_000417985.2
Staphylococcus epidermidis MC28	MC28	GCA_000418005.2
Staphylococcus epidermidis CIM37	CIM37	GCA_000418105.2
Staphylococcus epidermidis MC16	MC16	GCA_000418185.2
Staphylococcus epidermidis	SCH-16	GCA_002750025.1
Staphylococcus epidermidis	SCH-15	GCA_002750265.1
Staphylococcus epidermidis W23144	W23144	GCA_000160235.1
Staphylococcus epidermidis Scl22	Scl22	GCA_000418045.1
Staphylococcus epidermidis Scl19	Scl19	GCA_000418025.2
Staphylococcus epidermidis CIM28	CIM28	GCA_000418125.2
Staphylococcus epidermidis WI05	WI05	GCA_000418145.2
Staphylococcus epidermidis WI09	WI09	GCA_000418165.2
Sep NCBI ctr2
Staphylococcus epidermidis	SEI	GCA_000759555.1
Staphylococcus epidermidis	8400	GCA_000705035.1
Staphylococcus epidermidis	1296_SEPI	GCA_001069525.1
Staphylococcus epidermidis	1306.rep1_SEPI	GCA_001070485.1
Staphylococcus epidermidis	1306.rep2_SEPI	GCA_001070505.1
Staphylococcus epidermidis	161_SEPI	GCA_001071495.1
Staphylococcus epidermidis	695_SEPI	GCA_001073995.1
Staphylococcus epidermidis	MF1789	GCA_001651265.1
Staphylococcus epidermidis	Y24	GCA_002288605.1
Staphylococcus epidermidis VCU125	VCU125	GCA_000247125.2
Staphylococcus epidermidis VCU071	VCU071	GCA_000260295.1
Staphylococcus epidermidis NIHLM040	NIHLM040	GCA_000276365.1
Staphylococcus epidermidis VCU036	VCU036	GCA_000697905.1
Staphylococcus epidermidis	1289_SEPI	GCA_001068995.1
Staphylococcus epidermidis	1311_SEPI	GCA_001070535.1
Staphylococcus epidermidis	312_SEPI	GCA_001072235.1
Staphylococcus epidermidis	295_SEPI	GCA_001076655.1
Staphylococcus epidermidis	SNUT	GCA_001516785.1
Staphylococcus epidermidis	SCH-20	GCA_002750185.1
Staphylococcus epidermidis	NLAE-zl-G239	GCA_900113395.1
Staphylococcus epidermidis	I6	GCA_900205795.1
Staphylococcus epidermidis BVS058A4	BVS058A4	GCA_000314715.2
Staphylococcus epidermidis	SNUC 2400	GCA_003035275.1
Staphylococcus epidermidis	SNUC 1329	GCA_003035305.1
Staphylococcus epidermidis	SNUC 3868	GCA_003035705.1
Staphylococcus epidermidis	SNUC 2450	GCA_003035745.1
Sep NCBI ctr3
Staphylococcus epidermidis	677_SEPI	GCA_001073875.1
Staphylococcus epidermidis	997_SHAE	GCA_001075555.1
Staphylococcus epidermidis	998_SEPI	GCA_001075575.1
Staphylococcus epidermidis	978_SEPI	GCA_001076045.1
Staphylococcus epidermidis	AEEG06	GCA_001658565.1
Staphylococcus epidermidis	M25	GCA_001659475.1
Staphylococcus epidermidis	M01	GCA_001659505.1
Staphylococcus epidermidis	M26	GCA_001659515.1
Staphylococcus epidermidis	PEI-B-P-06	GCA_900108795.1
Staphylococcus epidermidis VCU117	VCU117	GCA_000247025.2
Staphylococcus epidermidis VCU126	VCU126	GCA_000247145.2
Staphylococcus epidermidis NIH051475	NIH051475	GCA_000275965.1
Staphylococcus epidermidis	196_SEPI	GCA_001071645.1
Staphylococcus epidermidis	236_SEPI	GCA_001071885.1
Staphylococcus epidermidis	270_SEPI	GCA_001072005.1
Staphylococcus epidermidis	281_SEPI	GCA_001072055.1
Staphylococcus epidermidis	1321_SEPI	GCA_001076185.1
Staphylococcus epidermidis	134_SEPI	GCA_001076265.1
Staphylococcus epidermidis	1191_SEPI	GCA_001076305.1
Staphylococcus epidermidis	SCH-12	GCA_002750115.1
Staphylococcus epidermidis	SCH-23	GCA_002752825.1
Staphylococcus epidermidis	SNUC 2473	GCA_003035245.1
Staphylococcus epidermidis	SAM-3	GCA_003038655.1
Sep NCBI ctr4
Staphylococcus epidermidis PM221	PM221	GCA_000751035.1
Staphylococcus epidermidis	1457	GCA_002085695.1
Staphylococcus epidermidis	FDAARGOS_161	GCA_002954055.1
Staphylococcus epidermidis	1457	GCA_000705075.1
Staphylococcus epidermidis	721_SAUR	GCA_001066085.1
Staphylococcus epidermidis	1115_SEPI	GCA_001070245.1
Staphylococcus epidermidis	393_SEPI	GCA_001072715.1
Staphylococcus epidermidis	597_SEPI	GCA_001073515.1
Staphylococcus epidermidis	818_SEPI	GCA_001075095.1
Staphylococcus epidermidis	AU21	GCA_001469325.1
Staphylococcus epidermidis	MIT 14-1777-C6	GCA_002417645.1
Staphylococcus epidermidis VCU144	VCU144	GCA_000205325.2
Staphylococcus epidermidis VCU028	VCU028	GCA_000205405.2
Staphylococcus epidermidis VCU081	VCU081	GCA_000245695.2
Staphylococcus epidermidis NIHLM039	NIHLM039	GCA_000276345.1
Staphylococcus epidermidis E13A	E13A	GCA_000443975.1
Staphylococcus epidermidis AG42	AG42	GCA_000703025.1
Staphylococcus epidermidis	AU23	GCA_001469315.1
Staphylococcus epidermidis	590_SEPI	GCA_001071395.1
Staphylococcus epidermidis	402_SEPI	GCA_001072775.1
Staphylococcus epidermidis	643_SEPI	GCA_001073675.1
Staphylococcus epidermidis	644_SEPI	GCA_001073685.1
Staphylococcus epidermidis	971_SEPI	GCA_001075515.1
Staphylococcus epidermidis	I6	GCA_900199525.1
Staphylococcus epidermidis	I6	GCA_900205845.1
Staphylococcus epidermidis BCM-HMP0060	BCM-HMP0060	GCA_000159575.1
Staphylococcus epidermidis Scl25	Scl25	GCA_000418065.2
Staphylococcus epidermidis Scl31	Scl31	GCA_000418085.2
Staphylococcus epidermidis	SNUC 2569	GCA_003035205.1
Staphylococcus epidermidis	SNUC 2538	GCA_003035225.1
Staphylococcus epidermidis	SNUC 1357	GCA_003035325.1
Staphylococcus epidermidis	SNUC 1209	GCA_003035345.1
Staphylococcus epidermidis	SNUC 258	GCA_003035385.1
Staphylococcus epidermidis	SNUC 75	GCA_003035405.1
Staphylococcus epidermidis	SNUC 29	GCA_003035425.1
Staphylococcus epidermidis	SNUC 5038	GCA_003035645.1
Sep NCBI ctr5
Staphylococcus epidermidis	1097_SEPI	GCA_001070155.1
Staphylococcus epidermidis	849_SEPI	GCA_001075165.1
Staphylococcus epidermidis	897_SEPI	GCA_001075235.1
Staphylococcus epidermidis	919_SEPI	GCA_001075315.1
Staphylococcus epidermidis	935_SEPI	GCA_001075405.1
Staphylococcus epidermidis	920_SEPI	GCA_001075685.1
Staphylococcus epidermidis	AOKB02	GCA_001658445.1
Staphylococcus epidermidis	A1KF08	GCA_001658475.1
Staphylococcus epidermidis	Qt1p44	GCA_001658525.1
Staphylococcus epidermidis	KED12	GCA_001658535.1
Staphylococcus epidermidis	XE_C06	GCA_001658555.1
Staphylococcus epidermidis	ENVL_032	GCA_001659425.1
Staphylococcus epidermidis	Mt1p16	GCA_001683645.1
Staphylococcus epidermidis	ABKWR	GCA_002221915.1
Staphylococcus epidermidis VCU045	VCU045	GCA_000205425.2
Staphylococcus epidermidis NIHLM001	NIHLM001	GCA_000276145.1
Staphylococcus epidermidis NIHLM020	NIHLM020	GCA_000276265.1
Staphylococcus epidermidis NIHLM067	NIHLM067	GCA_000276465.1
Staphylococcus epidermidis	1056_SEPI	GCA_001068545.1
Staphylococcus epidermidis	1067_SEPI	GCA_001068585.1
Staphylococcus epidermidis	1188_SEPI	GCA_001069375.1
Staphylococcus epidermidis	504_SEPI	GCA_001071215.1
Staphylococcus epidermidis	162_SEPI	GCA_001071515.1
Staphylococcus epidermidis	165_SEPI	GCA_001071565.1
Staphylococcus epidermidis	652_SEPI	GCA_001073765.1
Staphylococcus epidermidis	764_SEPI	GCA_001075015.1
Staphylococcus epidermidis	934_SEPI	GCA_001075395.1
Staphylococcus epidermidis	475_SEPI	GCA_001076465.1
Staphylococcus epidermidis	477_SEPI	GCA_001076495.1
Staphylococcus epidermidis	SCH-13	GCA_002750015.1
Staphylococcus epidermidis	SCH-11	GCA_002750095.1
Staphylococcus epidermidis	SCH-18	GCA_002750285.1
Staphylococcus epidermidis	C7	GCA_900199615.1
Staphylococcus epidermidis	I4	GCA_900205815.1
Staphylococcus epidermidis	C3	GCA_900205825.1
Staphylococcus epidermidis	FDAARGOS_153	GCA_002944995.1
Sep NCBI ctr6
Staphylococcus epidermidis	ET-024	GCA_000685135.1
Staphylococcus epidermidis	246_SEPI	GCA_001071935.1
Staphylococcus epidermidis	LRKNS085	GCA_001658785.1
Staphylococcus epidermidis	LRKNS092	GCA_001658805.1
Staphylococcus epidermidis	LRKNS093	GCA_001658815.1
Staphylococcus epidermidis	B7234	GCA_001659105.1
Staphylococcus epidermidis	B10873	GCA_001659125.1
Staphylococcus epidermidis	LRKNS114	GCA_001662145.1
Staphylococcus epidermidis	LRKNS117	GCA_001662155.1
Staphylococcus epidermidis	LRKNS116	GCA_001662165.1
Staphylococcus epidermidis	LRKNS115	GCA_001662175.1
Staphylococcus epidermidis	LRKNS118	GCA_001662225.1
Staphylococcus epidermidis	LRKNS111	GCA_001662985.1
Staphylococcus epidermidis	LRKNS113	GCA_001663015.1
Staphylococcus epidermidis	LRKNS112	GCA_001663025.1
Staphylococcus epidermidis NIH05005	NIH05005	GCA_000276125.1
Staphylococcus epidermidis NIHLM049	NIHLM049	GCA_000276385.1
Staphylococcus epidermidis VCU050	VCU050	GCA_000627055.1
Staphylococcus epidermidis	178_SEPI	GCA_001071635.1
Staphylococcus epidermidis	314_SEPI	GCA_001072245.1
Staphylococcus epidermidis	460_SEPI	GCA_001073075.1
Staphylococcus epidermidis	479_SEPI	GCA_001073115.1
Staphylococcus epidermidis	73_SEPI	GCA_001074075.1
Staphylococcus epidermidis	SCH-22	GCA_002752835.1
Staphylococcus epidermidis	MCO7	GCA_002907645.1
Staphylococcus epidermidis	ICE173	GCA_002907725.1
Sep NCBI ctr7
Staphylococcus epidermidis	DAR1907	GCA_002850315.1
Staphylococcus epidermidis	C10C	GCA_000763625.1
Staphylococcus epidermidis	568_SEPI	GCA_001073435.1
Staphylococcus epidermidis	686_SEPI	GCA_001073935.1
Staphylococcus epidermidis	705_SEPI	GCA_001074005.1
Staphylococcus epidermidis	749_SEPI	GCA_001074185.1
Staphylococcus epidermidis	890_SEPI	GCA_001074875.1
Staphylococcus epidermidis	LRKNS062	GCA_001622445.1
Staphylococcus epidermidis	LRKNS064	GCA_001622455.1
Staphylococcus epidermidis	LRKNS087	GCA_001658715.1
Staphylococcus epidermidis	LRKNS086	GCA_001658865.1
Staphylococcus epidermidis	B2461	GCA_001658995.1
Staphylococcus epidermidis	B16261	GCA_001659025.1
Staphylococcus epidermidis	B647	GCA_001659045.1
Staphylococcus epidermidis	B59	GCA_001659065.1
Staphylococcus epidermidis	B2731	GCA_001659075.1
Staphylococcus epidermidis	B12142	GCA_001659145.1
Staphylococcus epidermidis	B12916	GCA_001659165.1
Staphylococcus epidermidis	B13258	GCA_001659185.1
Staphylococcus epidermidis	B13587	GCA_001659205.1
Staphylococcus epidermidis	ENVH131	GCA_001659235.1
Staphylococcus epidermidis	ENVH150	GCA_001659345.1
Staphylococcus epidermidis	DAR2143	GCA_002908875.1
Staphylococcus epidermidis	604_SEPI	GCA_001073535.1
Staphylococcus epidermidis	623_SEPI	GCA_001073595.1
Staphylococcus epidermidis	663_SEPI	GCA_001073845.1
Staphylococcus epidermidis	656_SEPI	GCA_001074895.1
Staphylococcus epidermidis	761_SEPI	GCA_001074955.1
Staphylococcus epidermidis	819_SEPI	GCA_001075105.1
Staphylococcus epidermidis	973_SEPI	GCA_001076005.1
Staphylococcus epidermidis	760_SEPI	GCA_001077145.1
Staphylococcus epidermidis	MEX28	GCA_002907605.1
Staphylococcus epidermidis	AGT133	GCA_002907905.1
Staphylococcus epidermidis	URU27	GCA_002907935.1
Staphylococcus epidermidis	ITL533	GCA_002908085.1
Staphylococcus epidermidis	DAR2142	GCA_002908635.1
Sep NCBI ctr8
Staphylococcus epidermidis	NGS-ED-1107	GCA_000966705.1
Staphylococcus epidermidis	NGS-ED-1111	GCA_000966755.1
Staphylococcus epidermidis	NGS-ED-1117	GCA_000966765.1
Staphylococcus epidermidis	NGS-ED-1118	GCA_000966775.1
Staphylococcus epidermidis	NGS-ED-1110	GCA_000966815.1
Staphylococcus epidermidis	101_SEPI	GCA_001068455.1
Staphylococcus epidermidis	1295_SEPI	GCA_001069515.1
Staphylococcus epidermidis	921_SEPI	GCA_001075335.1
Staphylococcus epidermidis	961_SEPI	GCA_001075835.1
Staphylococcus epidermidis	SCH-1	GCA_002750225.1
Staphylococcus epidermidis	staphylococcus epidermidis	GCA_900169475.1
Staphylococcus epidermidis	1130_SEPI	GCA_001069215.1
Staphylococcus epidermidis	1040_SEPI	GCA_001070025.1
Staphylococcus epidermidis	15_SEPI	GCA_001070645.1
Staphylococcus epidermidis	16_SEPI	GCA_001070695.1
Staphylococcus epidermidis	386_SEPI	GCA_001071015.1
Staphylococcus epidermidis	21_SEPI	GCA_001071795.1
Staphylococcus epidermidis	364_SEPI	GCA_001072555.1
Staphylococcus epidermidis	366_SEPI	GCA_001072595.1
Staphylococcus epidermidis	642_SEPI	GCA_001073655.1
Staphylococcus epidermidis	8_SEPI	GCA_001074445.1
Staphylococcus epidermidis	821_SEPI	GCA_001075135.1
Staphylococcus epidermidis	92_SEPI	GCA_001075885.1
Staphylococcus epidermidis	SCH-7	GCA_002750125.1
Staphylococcus epidermidis	SCH-5	GCA_002750145.1
Staphylococcus epidermidis	SCH-4	GCA_002750175.1
Staphylococcus epidermidis	SCH-10	GCA_002750255.1
Staphylococcus epidermidis	SCH-9	GCA_002750335.1
Staphylococcus epidermidis	SCH-8	GCA_002750345.1
Staphylococcus epidermidis	SCH-6	GCA_002750355.1
Staphylococcus epidermidis	SCH-3	GCA_002750395.1
Staphylococcus epidermidis	DAR5955	GCA_002908415.1
Staphylococcus epidermidis	DAR5954	GCA_002908435.1
Staphylococcus epidermidis	DAR4887	GCA_002908665.1
Staphylococcus epidermidis	DAR5918	GCA_002908815.1
Staphylococcus epidermidis	DAR5953	GCA_002908825.1
